# Supplementary material for: Analysis of biomass productivity and physiology of Nitrososphaera viennensis grown in continuous culture
Source: Front Microbiol. 2023 Feb 16;14:1076342. doi: 10.3389/fmicb.2023.1076342 (PMC9978112; doi:10.3389/fmicb.2023.1076342)
Supplement: Supplementary file 1 [file Data_Sheet_1.docx]

Supplementary Material

# Supplementary Figures and Tables

## Supplementary Figures

**Supplementary Figure 1.** Effect of gassing on batch cultures. NH4+, NO2- and dO2 concentrations of open batch cultures gassed with 2 sL L-1 h-1 air (gas) or closed batch cultures (w/o gas) all containing 2 mmol L-1 NaHCO3 as C-source. Cultures gassed with air had decreased µ of 0.0276 ±0.0001 h-1 compared to closed batch cultures with µ 0.0445 ±0.0004 h-1. NH4+, NO2- and dO2 curves show mean values of biological duplicates and error bars represent the standard deviation of the mean.

**S****upplementary Figure 2.** Effect of gassing rate and in-gas flow composition on batch cultures. NH4+, NO2- and dO2 concentrations of open batch cultures gassed with 1 sL L-1 h-1 air (21% O2) or air/N2 mix (12.6% O2) to reduce the dO2 concentration. NO2- curves of closed batch (w/o gas) and open batch cultures gassed with 2 sL L-1 h-1 air (gas) are shown as comparison. Reducing the gassing rate did only marginally effect µ (0.0268 ±0.0001 h-1) while decreasing dO2 concentration did decrease µ to 0.0206 ±0.0001 h-1. The increase of dO2 at 135 h was due to technical issues. NH4+, NO2- and dO2 curves show mean values of biological duplicates and error bars represent the standard deviation of the mean.

**Supplementary Figure 3.** Maximum specific growth rate (µmax) of *N. viennensis*. µ of closed batch cultures grown at different dO2 concentrations in serum flasks with 0.5% CO2 in the atmosphere. Highest µ of 0.0508 ±0.0005 h-1 was achieved at 53.5 µmol L-1 dO2 (5% O2 in the gas phase) compared to 0.0484 ±0.0004 h-1 at 224.7 µmol L-1 (21% O2 in the gas phase). Due to the remarkable little effect of dO2 on µ, 21% O2 were used for continuous cultures and a µmax of 0.0484 h-1 was therefore assumed. µ values show the mean of quadruplets and error bars represent the standard deviation of the mean.

**Supplementary Figure 4.** Increase of cell number based growth rate in continuous cultures. µ of BR1 and BR2 based on cell concentration from D 0.035 h-1 to 0.060 h-1. Even though the cell concentration decreased from D 0.035 h-1 to D 0.050 h-1, µ increased with D but remained slightly below the set value until D 0.050 h-1 where it started to surpass D leading to an increase in cell concentration.

**Supplementary Figure 5.** Boxplots of NH4+ and cell number of continuous cultures at high dilution rates. (A) NH4+ concentrations of sections A (382 to 990 h), B (1032 to 1654 h), C (1796 to 2035 h) and D (2062 to 2402 h). Different steady states of BR1 and BR2 in sections C and D are signified by the corresponding number. Outliers known to be caused by technical issues (1271, 1295, 1343 and 1346 h) were removed from the dataset. (B) Cell number of BR1 and BR2 of sections A to D, the different steady states of BR1 and BR2 in sections C and D are signified by the corresponding number.

**Supplementary Figure 6.** Inhibitory effect of nitrite on the growth rate. 20 mL batch cultures grown in 30 mL polystyrene tubes with 1 mmol L-1 NH4+ and 0 to 19 mmol L-1 NO2- starting concentrations. NO2- exhibited only a weak linear inhibitory effect on µ with 0.0342 ±0.0004 h-1 to 0.0411 ±0.0005 h-1 for 19 and 0 mmol L-1 NO2- starting concentrations respectively. Initial pH of 7.5. µ values show the mean of triplicates and error bars represent the standard deviation of the mean.
